# Supplementary material
Source: PubMed Central journal article supplement (PMC395907)

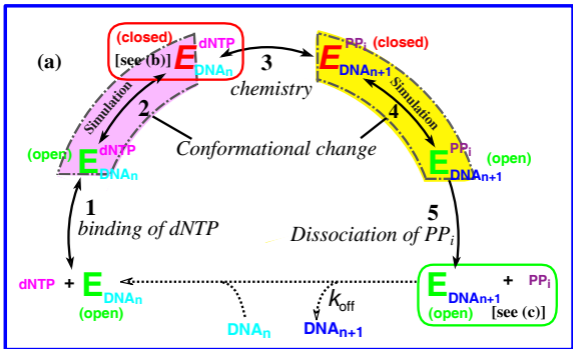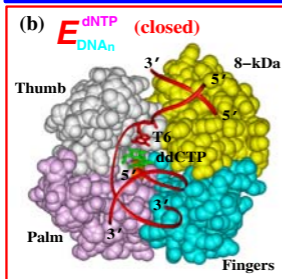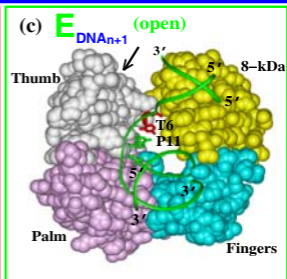

Supplement: pnas_101_16_5970__2.pdf [file pnas_101_16_5970__2.pdf]

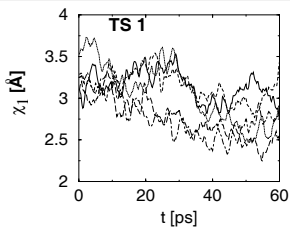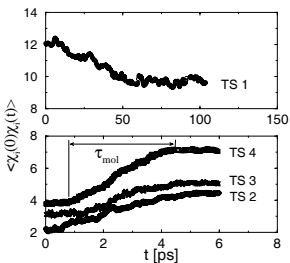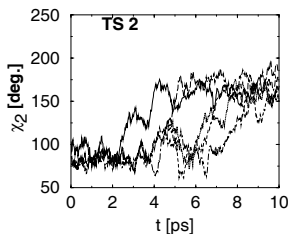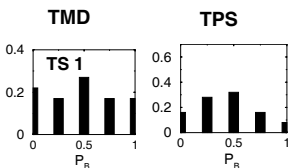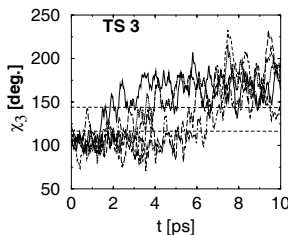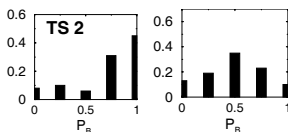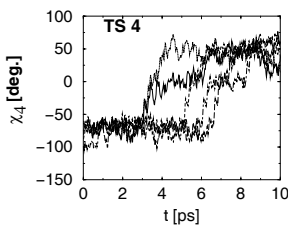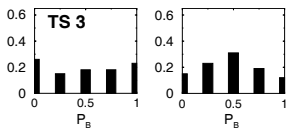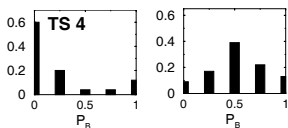

Supplement: pnas_101_16_5970__3.pdf [file pnas_101_16_5970__3.pdf]
